# Supplementary material
Source: MDPI journal article supplement (https://www.mdpi.com/2673-9410/4/2/13)
Supplement: s1 [file s1]

# Supplementary Material for “Comprehensive Analysis of Biomass, Nutrient, and Heavy Metal Contributions of Pelagic *Sargassum* Species (Phaeophyceae) Inundations in South Florida”

## Supplemental Tables

**Table S1.** Summary of collections and analyses of sargasso conducted at Dania Beach, Crandon Park, and Bill Baggs during the survey period (2018 to 2022).

| Site         | Year | Month     | Analysis                                                                |
|--------------|------|-----------|-------------------------------------------------------------------------|
| Dania Beach  | 2018 | September | Biomass                                                                 |
|              |      | October   | Biomass, Inorganic mass                                                 |
|              |      | January   | Biomass, Inorganic mass                                                 |
|              |      | February  | Biomass, Nutrient, Inorganic mass                                       |
|              | 2019 | March     | Biomass                                                                 |
|              |      | April     | Biomass, Nutrient, Inorganic mass                                       |
|              |      | July      | Biomass, Nutrient                                                       |
|              |      | July      | Biomass, Nutrient, Inorganic mass, Heavy metals                         |
|              | 2020 | May       | Nutrient, Inorganic mass, Heavy metals                                  |
|              |      | June      | Inorganic mass, Heavy metals                                            |
|              | 2021 | July      | Biomass, Nutrient, Inorganic mass, Heavy metals, Arsenic                |
|              |      | May       | Biomass, Inorganic mass                                                 |
|              | 2022 | June      | Biomass, Inorganic mass                                                 |
|              |      | July      | Biomass, Inorganic mass                                                 |
| Crandon Park | 2019 | August    | Nutrient                                                                |
|              | 2021 | May       | Biomass (not reported), Nutrient, Inorganic mass, Heavy metals, Arsenic |
|              |      | January   | Biomass (no sargassum to collect)                                       |
|              |      | February  | Biomass (no sargassum to collect)                                       |
|              |      | March     | Biomass (no sargassum to collect)                                       |
|              |      | April     | Biomass (no sargassum to collect)                                       |
|              |      | May       | Biomass, Inorganic mass                                                 |
|              | 2022 | June      | Biomass, Inorganic mass                                                 |
|              |      | July      | Biomass, Inorganic mass                                                 |
|              |      | August    | Biomass, Inorganic mass                                                 |
|              |      | September | Biomass (no sargassum to collect)                                       |
|              |      | October   | Biomass (no sargassum to collect)                                       |
|              |      | November  | Biomass (no sargassum to collect)                                       |
|              |      | December  | Biomass (no sargassum to collect)                                       |
|              |      | September | Nutrient, Inorganic mass                                                |
| Bill Baggs   | 2018 | December  | Nutrient                                                                |
|              |      | March     | Nutrient                                                                |
|              | 2019 | August    | Nutrient, Inorganic mass                                                |
|              |      | June      | Nutrient, Inorganic mass, Heavy metals, Arsenic                         |

**Table S2.** Results of parametric and non-parametric analyses on biomass of sargasso at Dania Beach and Crandon Park.

|                                                                   | Test           | P-value                                                                                                                |
|-------------------------------------------------------------------|----------------|------------------------------------------------------------------------------------------------------------------------|
| Biomass at Dania Beach<br><i>post hoc results</i>                 | Kruskal-Wallis | <b>0.01682</b><br>Jul22 > Sep18 = Oct18 = Jan19 = Feb19 = Apr19<br>= Jul19 = Jul20 = Jul21 = May22 = Jun 22 ><br>Mar19 |
| Biomass in 2019 at Dania Beach<br><i>post hoc results</i>         | Kruskal-Wallis | <b>0.046</b><br>Jan19 > (Feb19= Apr19= Jul19) > Mar19                                                                  |
| Biomass in July 2019 to 2022 at Dania Beach                       | Kruskal-Wallis | 0.2678                                                                                                                 |
| Biomass at Crandon Park                                           | Kruskal-Wallis | 0.0976                                                                                                                 |
| Biomass in July 2022 at Crandon Park<br><i>versus Dania Beach</i> | Mann-Whitney   | 0.4857                                                                                                                 |

*Significant differences are indicated in bold. Post hoc results were determined by a Dunn test ( $\alpha = 0.05$ ).*

**Table S3:** Results of parametric and non-parametric analyses on nutrient content of sargasso in South Florida.

|                                                                                               | Variable                                                             | Test           | P-value                                                                                                                                     |
|-----------------------------------------------------------------------------------------------|----------------------------------------------------------------------|----------------|---------------------------------------------------------------------------------------------------------------------------------------------|
| Morphotype<br>nutrient<br>content<br>grouped<br>across all<br>three sites                     | Carbon                                                               | Kruskal-Wallis | 0.1106                                                                                                                                      |
|                                                                                               | Nitrogen                                                             | One-way ANOVA  | $F = 2.864, P = 0.0621$                                                                                                                     |
|                                                                                               | Phosphorus                                                           | One-way ANOVA  | $F = 1.724, P = 0.184$                                                                                                                      |
|                                                                                               | Carbon:Phosphorus                                                    | One-way ANOVA  | $F = 2.342, P = 0.102$                                                                                                                      |
|                                                                                               | Carbon:Nitrogen                                                      | One-way ANOVA  | $F = 2.797, P = 0.0661$                                                                                                                     |
|                                                                                               | Nitrogen: Phosphorus<br><i>post hoc results</i>                      | One-way ANOVA  | <b><math>F = 4.377, P = 0.0152</math></b><br><i>S. fluitans III &gt; S. natans VIII,<br/>S. natans I= (S. fluitans III, S. natans VIII)</i> |
| Annual<br>nutrient<br>content from<br>2018 to<br>2021<br>grouped<br>across all<br>three sites | Carbon<br><i>significant post hoc differences only</i>               | Kruskal-Wallis | <b><math>2.586 \times 10^{-10}</math></b><br>2018 < 2020, 2019 < (2020, 2021)                                                               |
|                                                                                               | Nitrogen<br><i>post hoc results</i>                                  | Kruskal-Wallis | <b><math>5.599 \times 10^{-7}</math></b><br>2019 < (2018 = 2021) > 2020                                                                     |
|                                                                                               | Phosphorus<br><i>significant post hoc differences only</i>           | Kruskal-Wallis | <b><math>1.194 \times 10^{-6}</math></b><br>2019 > (2018, 2021)                                                                             |
|                                                                                               | Carbon:Phosphorus<br><i>significant post hoc differences only</i>    | Kruskal-Wallis | <b><math>6.378 \times 10^{-6}</math></b><br>2019 > (2018, 2021)                                                                             |
|                                                                                               | Carbon:Nitrogen<br><i>post hoc results</i>                           | Kruskal-Wallis | <b><math>5.118 \times 10^{-6}</math></b><br>2020 > 2018, 2019, 2021                                                                         |
|                                                                                               | Nitrogen: Phosphorus<br><i>significant post hoc differences only</i> | Kruskal-Wallis | <b><math>1.129 \times 10^{-5}</math></b><br>2019 > (2020, 2021)                                                                             |
| Nutrient<br>content from<br>2019 to<br>2021 at                                                | Carbon<br><i>post hoc results</i>                                    | Kruskal-Wallis | <b><math>2.360 \times 10^{-6}</math></b><br>2019 < (2020 = 2021)                                                                            |
|                                                                                               | Nitrogen<br><i>post hoc results</i>                                  | Kruskal-Wallis | <b><math>2.122 \times 10^{-5}</math></b><br>2019 > 2020 < 2021                                                                              |

|                                             |                         |                |                                           |
|---------------------------------------------|-------------------------|----------------|-------------------------------------------|
| Dania Beach only                            | Phosphorus              | Kruskal-Wallis | <b><math>3.261 \times 10^{-7}</math></b>  |
|                                             | <i>post hoc results</i> |                | 2019 < 2020 = 2021                        |
|                                             | Carbon:Phosphorus       | Kruskal-Wallis | <b><math>2.525 \times 10^{-6}</math></b>  |
|                                             | <i>post hoc results</i> |                | (2019 = 2020) > 2021                      |
|                                             | Carbon:Nitrogen         | Kruskal-Wallis | <b><math>8.114 \times 10^{-6}</math></b>  |
|                                             | <i>post hoc results</i> |                | (2019 = 2021) < 2020                      |
|                                             | Nitrogen: Phosphorus    | Kruskal-Wallis | <b><math>3.942 \times 10^{-7}</math></b>  |
|                                             | <i>post hoc results</i> |                | 2019 > (2020 = 2021)                      |
| Nutrient content in 2019 at all three sites | Carbon                  | Kruskal-Wallis | 0.1917                                    |
|                                             | Nitrogen                | Kruskal-Wallis | 0.06903                                   |
|                                             | Phosphorus              | Kruskal-Wallis | <b>0.01086</b>                            |
|                                             |                         |                | (Bill Baggs < Crandon Park) = Dania Beach |
|                                             | Carbon:Phosphorus       | Kruskal-Wallis | <b>0.01882</b>                            |
|                                             |                         |                | (Bill Baggs < Crandon Park) = Dania Beach |
|                                             | Carbon:Nitrogen         | Kruskal-Wallis | 0.06811                                   |
|                                             | Nitrogen: Phosphorus    | Kruskal-Wallis | <b>0.001366</b>                           |
|                                             | <i>post hoc results</i> |                | (Bill Baggs = Dania Beach) < Crandon Park |
| Nutrient content in 2021 at all three sites | Carbon                  | Kruskal-Wallis | 0.520                                     |
|                                             | Nitrogen                | Kruskal-Wallis | 0.07694                                   |
|                                             | Phosphorus              | Kruskal-Wallis | 0.1226                                    |
|                                             | Carbon:Phosphorus       | Kruskal-Wallis | 0.1108                                    |
|                                             | Carbon:Nitrogen         | Kruskal-Wallis | 0.1036                                    |
|                                             | Nitrogen: Phosphorus    | Kruskal-Wallis | 0.3816                                    |

*Significant differences are indicated in bold. Post hoc results for one-way ANOVA were determined by a Tukey (HSD) test ( $\alpha = 0.05$ ) and results for Kruskal-Wallis were determined using a Dunn test ( $\alpha = 0.05$ ).*

**Table S4:** Percent carbon, nitrogen, phosphorus, and nutrient ratios (mean  $\pm$  standard error) for dry weight values of sargasso in South Florida.

| Morphotype             | Carbon           | Nitrogen        | Phosphorus       | C:N              | C:P               | N:P             |
|------------------------|------------------|-----------------|------------------|------------------|-------------------|-----------------|
| <i>S. fluitans III</i> | 35.95 $\pm$ 0.4  | 0.93 $\pm$ 0.03 | 0.03 $\pm$ 0.003 | 47.93 $\pm$ 1.8  | 3477.13 $\pm$ 185 | 71.51 $\pm$ 2.9 |
| <i>S. natans I</i>     | 36.12 $\pm$ 0.6  | 1.04 $\pm$ 0.04 | 0.05 $\pm$ 0.005 | 44.00 $\pm$ 1.9  | 2973.72 $\pm$ 204 | 64.33 $\pm$ 3.1 |
| <i>S. natans VIII</i>  | 37.65 $\pm$ 0.4  | 0.86 $\pm$ 0.03 | 0.04 $\pm$ 0.003 | 51.91 $\pm$ 2    | 2870.66 $\pm$ 213 | 54.92 $\pm$ 3.5 |
|                        | 36.27 $\pm$ 0.34 | 0.97 $\pm$ 0.02 | 0.04 $\pm$ 0.002 | 46.83 $\pm$ 1.19 | 3173.69 $\pm$ 124 | 66.03 $\pm$ 2.0 |

**Table S5.** Results of parametric and non-parametric analyses on elemental concentrations of sargasso at all three sites. Dashes indicate more than two elemental concentrations were not present.

|                              |    | Test          | P-value                                    |
|------------------------------|----|---------------|--------------------------------------------|
| Dania Beach<br><i>versus</i> | Ag | One-way ANOVA | -                                          |
|                              | As | One-way ANOVA | <b><math>F = 13.16, P = 0.00226</math></b> |

|                                                                                            |                                              |                |                                             |
|--------------------------------------------------------------------------------------------|----------------------------------------------|----------------|---------------------------------------------|
| Crandon Park concentrations in May 2021                                                    | <i>post hoc results</i>                      |                | Dania Beach > Crandon Park                  |
|                                                                                            | Ba                                           | One-way ANOVA  | $F = 1.329, P = 0.266$                      |
|                                                                                            | Be                                           | One-way ANOVA  | -                                           |
|                                                                                            | Cd                                           | One-way ANOVA  | <b><math>F = 11.42, P = 0.00382</math></b>  |
|                                                                                            |                                              |                | Dania Beach < Crandon Park                  |
|                                                                                            | Co                                           | One-way ANOVA  | $F = 0.827, P = 0.377$                      |
|                                                                                            | Cr                                           | One-way ANOVA  | <b><math>F = 5.151, P = 0.0374</math></b>   |
|                                                                                            | <i>post hoc results</i>                      |                | Dania Beach > Crandon Park                  |
|                                                                                            | Cu                                           | One-way ANOVA  | $F = 1.359, P = 0.261$                      |
|                                                                                            | Hg                                           | One-way ANOVA  | -                                           |
|                                                                                            | Mn                                           | One-way ANOVA  | $F = 0.836, P = 0.374$                      |
|                                                                                            | Mo                                           | One-way ANOVA  | <b><math>F = 20.92, P = 0.000312</math></b> |
|                                                                                            | <i>post hoc results</i>                      |                | Dania Beach < Crandon Park                  |
|                                                                                            | Ni                                           | One-way ANOVA  | $F = 0.441, P = 0.516$                      |
|                                                                                            | Pb                                           | One-way ANOVA  | $F = 1.139, P = 0.302$                      |
|                                                                                            | Se                                           | One-way ANOVA  | $F = 0.076, P = 0.787$                      |
|                                                                                            | V                                            | One-way ANOVA  | $F = 0.19, P = 0.669$                       |
|                                                                                            | Zn                                           | One-way ANOVA  | $F = 2.971, P = 0.104$                      |
| Dania Beach versus Bill Baggs concentrations in June 2021                                  | Ag                                           | One-way ANOVA  | -                                           |
|                                                                                            | As                                           | One-way ANOVA  | $F = 0.008, P = 0.932$                      |
|                                                                                            | Ba                                           | Kruskal-Wallis | <b>0.01235</b>                              |
|                                                                                            |                                              |                | Dania Beach < Bill Baggs                    |
|                                                                                            | Be                                           | One-way ANOVA  | $F = 0.1, P = 0.76$                         |
|                                                                                            | Cd                                           | One-way ANOVA  | <b><math>F = 12.26, P = 0.00322</math></b>  |
|                                                                                            |                                              |                | Dania Beach < Bill Baggs                    |
|                                                                                            | Co                                           | One-way ANOVA  | $F = 0.272, P = 0.61$                       |
|                                                                                            | Cr                                           | One-way ANOVA  | $F = 0.233, P = 0.636$                      |
|                                                                                            | Cu                                           | One-way ANOVA  | <b><math>F = 9.644, P = 0.00724</math></b>  |
|                                                                                            |                                              |                | Dania Beach < Bill Baggs                    |
|                                                                                            | Hg                                           | One-way ANOVA  | -                                           |
|                                                                                            | Mn                                           | One-way ANOVA  | $F = 2.89, P = 0.11$                        |
|                                                                                            | Mo                                           | One-way ANOVA  | $F = 2.208, P = 0.158$                      |
|                                                                                            | Ni                                           | One-way ANOVA  | <b><math>F = 5.249, P = 0.0368</math></b>   |
|                                                                                            | <i>post hoc results</i>                      |                | Dania Beach > Bill Baggs                    |
|                                                                                            | Pb                                           | One-way ANOVA  | $F = 0.023, P = 0.881$                      |
|                                                                                            | Se                                           | One-way ANOVA  | <b><math>F = 13.43, P = 0.0023</math></b>   |
|                                                                                            |                                              |                | Dania Beach < Bill Baggs                    |
|                                                                                            | V                                            | Kruskal-Wallis | <b>0.001496</b>                             |
|                                                                                            | <i>post hoc results</i>                      |                | Dania Beach < Bill Baggs                    |
|                                                                                            | Zn                                           | One-way ANOVA  | <b><math>F = 5.774, P = 0.0297</math></b>   |
| Sampling times at Dania Beach from 2020 to 2021(July 2020, May 2021, June 2021, June 2021) | <i>post hoc results</i>                      |                | Dania < Bill Baggs                          |
|                                                                                            | Ag                                           | One-way ANOVA  | -                                           |
|                                                                                            | As                                           | One-way ANOVA  | <b><math>F = 5.114, P = 0.00409</math></b>  |
|                                                                                            | <i>significant post hoc differences only</i> |                | July 2020 > June 2021                       |
|                                                                                            | Ba                                           | Kruskal-Wallis | <b><math>8.297 \times 10^{-5}</math></b>    |
|                                                                                            | <i>significant post hoc differences only</i> |                | July 2020 < May 2021, July 2021             |
|                                                                                            |                                              |                | July 2021 > July 2020                       |
|                                                                                            |                                              |                | May 2021 > July 2020, June 2021, July 2021  |
|                                                                                            |                                              |                |                                             |
|                                                                                            |                                              |                |                                             |

|                                                                    |                                              |                |                                                        |                                            |
|--------------------------------------------------------------------|----------------------------------------------|----------------|--------------------------------------------------------|--------------------------------------------|
| Dania Beach concentrations in July 2020 versus July 2021           | 2021, and July 2021)                         |                |                                                        | June 2021 < May 2021<br>0.2276             |
|                                                                    | Be                                           | Kruskal-Wallis |                                                        |                                            |
|                                                                    | Cd                                           | One-way ANOVA  | <b><math>F = 4.661, P = 0.00659</math></b>             | July 2021 > June 2021, July 2020           |
|                                                                    | <i>significant post hoc differences only</i> |                |                                                        |                                            |
|                                                                    | Co                                           | One-way ANOVA  | <b><math>F = 4.294, P = 0.00977</math></b>             | July 2020 < June 2021, July 2021           |
|                                                                    | <i>significant post hoc differences only</i> |                |                                                        |                                            |
|                                                                    | Cr                                           | One-way ANOVA  | <b><math>F = 10.26, P = 3.23 \times 10^{-5}</math></b> | May 2021 > July 2020, June 2021, July 2021 |
|                                                                    | <i>post hoc results</i>                      |                |                                                        |                                            |
|                                                                    | Cu                                           | One-way ANOVA  | $F = 0.595, P = 0.622$                                 |                                            |
|                                                                    | Hg                                           | One-way ANOVA  | $F = 2.471, P = 0.0876$                                |                                            |
|                                                                    | Mn                                           | One-way ANOVA  | $F = 2.023, P = 0.125$                                 |                                            |
|                                                                    | Mo                                           | One-way ANOVA  | <b><math>F = 3.293, P = 0.0294</math></b>              | July 2021 > May 2021                       |
|                                                                    | <i>significant post hoc differences only</i> |                |                                                        |                                            |
|                                                                    | Ni                                           | One-way ANOVA  | $F = 1.216, P = 0.315$                                 |                                            |
|                                                                    | Pb                                           | One-way ANOVA  | $F = 0.169, P = 0.916$                                 |                                            |
|                                                                    | Se                                           | One-way ANOVA  | <b><math>F = 3.093, P = 0.0368</math></b>              | May 2021 > June 2021                       |
|                                                                    | <i>significant post hoc differences only</i> |                |                                                        |                                            |
|                                                                    | V                                            | One-way ANOVA  | $F = 1.699, P = 0.182$                                 |                                            |
|                                                                    | Zn                                           | One-way ANOVA  | <b><math>F = 4.857, P = 0.00536</math></b>             | July 2020 > July 2021, May 2021            |
|                                                                    | <i>significant post hoc differences only</i> |                |                                                        |                                            |
|                                                                    | Ag                                           | One-way ANOVA  | -                                                      |                                            |
|                                                                    | As                                           | One-way ANOVA  | <b><math>F = 17.38, P = 0.000238</math></b>            | July 2020 > July 2021                      |
|                                                                    | <i>post hoc results</i>                      |                |                                                        |                                            |
|                                                                    | Ba                                           | One-way ANOVA  | <b><math>F = 20.22, P = 0.000118</math></b>            | July 2020 < July 2021                      |
|                                                                    | <i>post hoc results</i>                      |                |                                                        |                                            |
|                                                                    | Be                                           | One-way ANOVA  | $F = 2.783, P = 0.115$                                 |                                            |
|                                                                    | Cd                                           | Kruskal-Wallis | <b>0.009051</b>                                        | July 2021 > July 2020                      |
|                                                                    | <i>post hoc results</i>                      |                |                                                        |                                            |
|                                                                    | Co                                           | One-way ANOVA  | <b><math>F = 10.68, P = 0.00295</math></b>             | July 2020 < July 2021                      |
|                                                                    | <i>post hoc results</i>                      |                |                                                        |                                            |
|                                                                    | Cr                                           | One-way ANOVA  | $F = 1.869, P = 0.183$                                 |                                            |
|                                                                    | Cu                                           | One-way ANOVA  | $F = 0.501, P = 0.485$                                 |                                            |
|                                                                    | Hg                                           | One-way ANOVA  | $F = 2.172, P = 0.164$                                 |                                            |
|                                                                    | Mn                                           | One-way ANOVA  | $F = 0.977, P = 0.332$                                 |                                            |
|                                                                    | Mo                                           | One-way ANOVA  | $F = 0.782, P = 0.384$                                 |                                            |
|                                                                    | Ni                                           | One-way ANOVA  | $F = 0.034, P = 0.855$                                 |                                            |
|                                                                    | Pb                                           | One-way ANOVA  | $F = 0.31, P = 0.582$                                  |                                            |
|                                                                    | Se                                           | One-way ANOVA  | $F = 0.96, P = 0.336$                                  |                                            |
|                                                                    | V                                            | One-way ANOVA  | $F = 3.508, P = 0.0723$                                |                                            |
|                                                                    | Zn                                           | One-way ANOVA  | <b><math>F = 8.097, P = 0.00836</math></b>             | July 2020 < July 2021                      |
|                                                                    | <i>post hoc results</i>                      |                |                                                        |                                            |
| Dania Beach sampling times in 2021 “peak-season” (May, June, July) | Ag                                           | One-way ANOVA  | -                                                      |                                            |
|                                                                    | As                                           | One-way ANOVA  | $F = 2.753, P = 0.0784$                                |                                            |
|                                                                    | Ba                                           | Kruskal-Wallis | <b>0.004341</b>                                        | June 2021 > May 2021                       |
|                                                                    | <i>significant post hoc differences only</i> |                |                                                        |                                            |
|                                                                    | Be                                           | One-way ANOVA  | $F = 0.053, P = 0.949$                                 |                                            |
|                                                                    | Cd                                           | One-way ANOVA  | $F = 3.083, P = 0.0592$                                |                                            |
|                                                                    | Co                                           | One-way ANOVA  | $F = 0.462, P = 0.634$                                 |                                            |

|                                              |                |                                            |
|----------------------------------------------|----------------|--------------------------------------------|
| Cr                                           | One-way ANOVA  | <b><math>F = 10.36, P = 0.00322</math></b> |
| <i>post hoc results</i>                      |                | May 2021 > June 2021, July 2021            |
| Cu                                           | One-way ANOVA  | <b><math>F = 6.742, P = 0.00351</math></b> |
| <i>post hoc results</i>                      |                | May 2021 > June 2021, July 2021            |
| Hg                                           | One-way ANOVA  | All samples have 0 concentration           |
| Mn                                           | One-way ANOVA  | $F = 1.935, P = 0.161$                     |
| Mo                                           | Kruskal-Wallis | <b>0.005473</b>                            |
| <i>significant post hoc differences only</i> |                | May 2021 < July 2021                       |
| Ni                                           | One-way ANOVA  | $F = 1.501, P = 0.238$                     |
| Pb                                           | One-way ANOVA  | $F = 0.153, P = 0.859$                     |
| Se                                           | One-way ANOVA  | <b><math>F = 4.29, P = 0.0221</math></b>   |
| <i>significant post hoc differences only</i> |                | May 2021 > June 2021                       |
| V                                            | One-way ANOVA  | $F = 0.951, P = 0.397$                     |
| Zn                                           | One-way ANOVA  | <b><math>F = 7.88, P = 0.00159</math></b>  |
| <i>post hoc results</i>                      |                | July 2021 > June 2021, May 2021            |

Significant differences are indicated in bold. Post hoc results for one-way ANOVA were determined by a Tukey (HSD) test ( $\alpha = 0.05$ ) and results for Kruskal-Wallis were determined using a Dunn test ( $\alpha = 0.05$ ).

**Table S6.** Element concentrations (mean  $\pm$  SD) of sargasso in South Florida reported in mg kg<sup>-1</sup> dw from this study are indicated in blue rows. Element concentrations (mean  $\pm$  SD or range) of sargasso from previous studies reported in mg kg<sup>-1</sup> dw or ug g<sup>-1</sup> dw conducted in other countries are indicated in yellow rows. Maximum levels permitted by different countries in agricultural soils reported in ppm or mg kg<sup>-1</sup> dw are indicated in green rows.

| Region                         | Morphotype               | Ag              | As                | Ba               | Be    | Cd                 | Co              | Cr               | Cu              | Hg               | Mn                | Mo              | Ni               | Pb              | Se              | V               | Zn              |
|--------------------------------|--------------------------|-----------------|-------------------|------------------|-------|--------------------|-----------------|------------------|-----------------|------------------|-------------------|-----------------|------------------|-----------------|-----------------|-----------------|-----------------|
| Florida*                       | <i>S. fluitans</i> III   | -               | 53.90 $\pm$ 22.66 | 20.11 $\pm$ 6.08 | < LOD | 0.43 $\pm$ 0.11    | 0.60 $\pm$ 0.08 | 0.40 $\pm$ 0.24  | 2.58 $\pm$ 0.56 | < LOD            | 16.36 $\pm$ 4.83  | 0.14 $\pm$ 0.05 | 2.17 $\pm$ 0.57  | 0.19 $\pm$ 0.06 | 0.74 $\pm$ 0.20 | 2.54 $\pm$ 3.20 | 8.56 $\pm$ 1.91 |
|                                | <i>S. natans</i> I       | 0.25 $\pm$ 0.31 | 39.86 $\pm$ 16.25 | 22.75 $\pm$ 6.68 | < LOD | 0.50 $\pm$ 0.13    | 0.66 $\pm$ 0.12 | 0.50 $\pm$ 0.37  | 2.51 $\pm$ 0.79 | 0.03 $\pm$ 0.05  | 33.28 $\pm$ 11.46 | 0.19 $\pm$ 0.05 | 2.65 $\pm$ 0.48  | 0.26 $\pm$ 0.1  | 0.83 $\pm$ 0.22 | 2.47 $\pm$ 2.81 | 8.83 $\pm$ 2.62 |
|                                | <i>S. natans</i> VIII    | 0.05 $\pm$ 0.05 | 52.38 $\pm$ 19.33 | 19.04 $\pm$ 6.31 | < LOD | 0.34 $\pm$ 0.11    | 0.41 $\pm$ 0.10 | 0.47 $\pm$ 0.58  | 2.60 $\pm$ 2.71 | 0.01 $\pm$ 0.01  | 17.16 $\pm$ 7.27  | 0.12 $\pm$ 0.03 | 2.23 $\pm$ 1.17  | 0.24 $\pm$ 0.21 | 0.55 $\pm$ 0.14 | 1.33 $\pm$ 0.96 | 8.75 $\pm$ 2.75 |
|                                | Pelagic Sargassum        | 0.11 $\pm$ 0.18 | 52.74 $\pm$ 20.58 | 20.57 $\pm$ 6.46 | < LOD | 0.44 $\pm$ 0.13    | 0.56 $\pm$ 0.15 | 0.43 $\pm$ 0.41  | 2.54 $\pm$ 1.63 | 0.01 $\pm$ 0.03  | 22.06 $\pm$ 11.36 | 0.15 $\pm$ 0.05 | 2.40 $\pm$ 0.81  | 0.22 $\pm$ 0.14 | 0.70 $\pm$ 0.22 | 2.05 $\pm$ 2.53 | 8.73 $\pm$ 2.41 |
| Tropical Atlantic <sup>1</sup> | <i>S. fluitans</i> III   |                 | 81 $\pm$ 59       |                  |       | 0.65 $\pm$ 0.59    | 0.39 $\pm$ 0.30 | 1.9 $\pm$ 1.3    | 1.93 $\pm$ 0.48 |                  | 22 $\pm$ 35       |                 | 2.8 $\pm$ 0.7    | 0.52 $\pm$ 0.59 |                 | 8.6 $\pm$ 9.2   | 6.4 $\pm$ 4.3   |
|                                | <i>S. natans</i> I       |                 | 72 $\pm$ 25       |                  |       | 0.80 $\pm$ 0.64    | 0.42 $\pm$ 0.27 | 0.9 $\pm$ 0.6    | 1.68 $\pm$ 0.47 |                  | 28 $\pm$ 28       |                 | 3.3 $\pm$ 1.0    | 0.45 $\pm$ 0.53 |                 | 7.3 $\pm$ 8.4   | 5.3 $\pm$ 3.1   |
|                                | <i>S. natans</i> VIII    |                 | 96 $\pm$ 33       |                  |       | 0.58 $\pm$ 0.44    | 0.27 $\pm$ 0.30 | 2.1 $\pm$ 4.7    | 1.12 $\pm$ 0.24 |                  | 21 $\pm$ 30       |                 | 2.8 $\pm$ 0.7    | 0.25 $\pm$ 0.26 |                 | 3.7 $\pm$ 2.8   | 5.3 $\pm$ 4.1   |
| Tropical Atlantic <sup>2</sup> | Pelagic <i>Sargassum</i> |                 | 87.92 $\pm$ 13.87 |                  |       | 0.70 $\pm$ 0.09    |                 | 4.16 $\pm$ 1.11  | 1.53 $\pm$ 0.49 |                  | 19.42 $\pm$ 5.69  |                 | 3.07 $\pm$ 0.26  |                 |                 | 1.33 $\pm$ 0.08 | 6.68 $\pm$ 0.83 |
| Tropical Atlantic <sup>2</sup> | Pelagic <i>Sargassum</i> |                 | 85.43 $\pm$ 10.43 |                  |       | 0.86 $\pm$ 0.05    |                 | 0.52 $\pm$ 0.16  | 1.67 $\pm$ 0.13 |                  | 19.89 $\pm$ 7.15  |                 | 3.30 $\pm$ 0.67  |                 |                 | 8.17 $\pm$ 0.69 | 8.17 $\pm$ 1.36 |
| Tropical Atlantic <sup>2</sup> | Pelagic <i>Sargassum</i> |                 | 95.93 $\pm$ 13.17 |                  |       | 1.01 $\pm$ 0.11    |                 | 0.735 $\pm$ 0.37 | <LOD            |                  | 23.71 $\pm$ 7.21  |                 | 3.93 $\pm$ 0.58  |                 |                 | 1.43 $\pm$ 0.03 | 8.30 $\pm$ 1.33 |
| Tropical Atlantic <sup>2</sup> | Pelagic <i>Sargassum</i> |                 | 88.60 $\pm$ 8.78  |                  |       | 1.05 $\pm$ 0.81    |                 | 0.72 $\pm$ 0.12  | 2.15 $\pm$ 0.81 |                  | 22.82 $\pm$ 6.48  |                 | 3.95 $\pm$ 0.25  |                 |                 | 2.24 $\pm$ 0.64 | 5.30 $\pm$ 1.30 |
| Tropical Atlantic <sup>2</sup> | Pelagic <i>Sargassum</i> |                 | 99.53 $\pm$ 9.06  |                  |       | 1.04 $\pm$ 0.01    |                 | 2.30 $\pm$ 0.82  | 3.51 $\pm$ 0.80 |                  | 24.76 $\pm$ 13.17 |                 | 5.08 $\pm$ 1.28  |                 |                 | 1.90 $\pm$ 0.96 | 6.07 $\pm$ 0.91 |
| Tropical Atlantic <sup>2</sup> | Pelagic <i>Sargassum</i> |                 | 88.23 $\pm$ 8.78  |                  |       | 82.88 $\pm$ 120.15 |                 | 4.66 $\pm$ 1.60  | 3.87 $\pm$ 0.69 |                  | 24.27 $\pm$ 8.29  |                 | 5.86 $\pm$ 2.25  |                 |                 | 1.38 $\pm$ 0.26 | 7.11 $\pm$ 0.86 |
| Tropical Atlantic <sup>2</sup> | Pelagic <i>Sargassum</i> |                 | 103.44 $\pm$ 9.53 |                  |       | 0.48 $\pm$ 0.024   |                 | 2.39 $\pm$ 1.01  | 4.24 $\pm$ 0.33 |                  | 22.44 $\pm$ 9.62  |                 | 4.16 $\pm$ 0.001 |                 |                 | 2.42 $\pm$ 1.28 | 4.65 $\pm$ 0.39 |
| Tropical Atlantic <sup>3</sup> | Pelagic <i>Sargassum</i> |                 | 225 $\pm$ 1.1     |                  |       | 0.24 $\pm$ 0.005   | 1.49 $\pm$ 0.12 |                  | 3.31 $\pm$ 0.1  | 0.03 $\pm$ 0.001 | 23.0 $\pm$ 0.23   |                 | 9.32 $\pm$ 0.20  |                 |                 | 31.9 $\pm$ 1.99 | 13.2 $\pm$ 0.20 |
| Tropical Atlantic <sup>3</sup> | Pelagic <i>Sargassum</i> |                 | 130 $\pm$ 1.7     |                  |       | 0.79 $\pm$ 0.03    | 0.85 $\pm$ 0.08 |                  | 3.01 $\pm$ 0.17 | -                | 16.2 $\pm$ 0.05   |                 | 3.54 $\pm$ 0.14  |                 |                 | 2.31 $\pm$ 0.06 | 13.2 $\pm$ 0.26 |
| Tropical Atlantic <sup>3</sup> | Pelagic <i>Sargassum</i> |                 | 146 $\pm$ 4.9     |                  |       | 0.64 $\pm$ 0.02    | 0.67 $\pm$ 0.05 |                  | 2.96 $\pm$ 0.01 | 0.02 $\pm$ 0.001 | 31.1 $\pm$ 0.84   |                 | 5.43 $\pm$ 0.11  |                 |                 | 12.4 $\pm$ 1.54 | 17.3 $\pm$ 0.38 |

|                                |                          |  |                  |                  |  |              |             |             |             |               |                  |       |             |             |             |             |                  |
|--------------------------------|--------------------------|--|------------------|------------------|--|--------------|-------------|-------------|-------------|---------------|------------------|-------|-------------|-------------|-------------|-------------|------------------|
| Tropical Atlantic <sup>3</sup> | Pelagic <i>Sargassum</i> |  | 144 ± 4.5        |                  |  | 0.555 ± 0.04 | 0.45 ± 0.07 |             | 3.21 ± 0.08 | 0.019         | 26.28 ± 0.56     |       | 4.81 ± 0.21 |             |             | 13.1 ± 5.52 | 3.72 ± 0.31      |
| Tropical Atlantic <sup>3</sup> | Pelagic <i>Sargassum</i> |  | 134 ± 1.5        |                  |  | 0.83 ± 0.01  | 0.54 ± 0.01 |             | 4.55 ± 0.12 | 0.018 ± 0.001 | 18.2 ± 0.84      |       | 3.71 ± 0.09 |             |             | 6.09 ± 0.19 | 4.28 ± 0.3       |
| Tropical Atlantic <sup>3</sup> | Pelagic <i>Sargassum</i> |  | 124 ± 2.3        |                  |  | 0.54 ± 0.01  | 0.86 ± 0.03 |             | 5.31 ± 0.61 | 2.01          | 48.2±0.67        |       | 7.19 ±0.23  |             |             | 1.72 ±0.08  | 24.6 ± 2.01      |
| Tropical Atlantic <sup>3</sup> | Pelagic <i>Sargassum</i> |  | 116 ± 4.0        |                  |  | 0.77 ± 0.01  | 0.44 ± 0.02 |             | 4.27 ± 0.17 | 0.015 ± 0.001 | 28.0±0.70        |       | 13.82 ±0.56 |             |             | 1.94±0.19   | 5.06 ± 0.36      |
| Mexico <sup>4</sup>            | <i>S. fluitans</i> III   |  | 77.80 ± 5.1<br>2 |                  |  | 0.54 ± 0.07  | 2.85 ± 0.22 |             |             |               |                  |       | 4.57 ± 0.63 |             |             |             | 4.99 ± 0.62      |
| Mexico <sup>4</sup>            | <i>S. natans</i> I       |  | 58.93 ± 3.4<br>9 |                  |  | 0.58 ± 0.07  | 2.34 ± 0.19 |             |             |               |                  |       | 6.15 ± 0.52 |             |             |             | 4.76 ± 0.57      |
| Mexico <sup>4</sup>            | <i>S. natans</i> VIII    |  | 87.41 ± 5.6<br>4 |                  |  | 0.77 ± 0.08  | 1.55 ± 0.15 |             |             |               |                  |       | 4.19 ± 0.72 |             |             |             | 5.99 ± 1.28      |
| Mexico <sup>5</sup>            | Pelagic <i>Sargassum</i> |  | 65.70 ± 31.97    |                  |  | 0.60 ± 0.69  |             |             | 0.63 ± 1.34 |               |                  |       |             |             | <0.20       |             | 3.65 ± 1.53      |
| Mexico <sup>5</sup>            | Pelagic <i>Sargassum</i> |  | 40.50 ± 6.97     |                  |  | 1.27 ± 0.36  |             |             | <0.20       |               |                  |       |             |             | <0.20       |             | 3.96 ± 2.16      |
| Mexico <sup>5</sup>            | Pelagic <i>Sargassum</i> |  | 43.20 ± 15.61    |                  |  | 0.80 ± 0.53  |             |             | 0.32 ± 0.55 |               |                  |       |             |             | <0.20       |             | 5.82 ± 3.03      |
| Mexico <sup>5</sup>            | Pelagic <i>Sargassum</i> |  | 41.10 ± 10.87    |                  |  | 1.36 ± 0.67  |             |             | 0.60 ± 0.84 |               |                  |       |             |             | <0.20       |             | 3.64 ± 1.04      |
| Mexico <sup>5</sup>            | Pelagic <i>Sargassum</i> |  | 29.00 ± 6.24     |                  |  | 1.20 ± 0.35  |             |             | 0.90 ± 0.95 |               |                  |       |             |             | 0.22 ± 0.48 |             | 7.20 ± 2.66      |
| Mexico <sup>5</sup>            | Pelagic <i>Sargassum</i> |  | 64.90 ± 5.29     |                  |  | 0.32 ± 0.32  |             |             | 1.09 ± 1.61 |               |                  |       |             |             | 0.29 ± 0.33 |             | 5.03 ± 1.53      |
| Mexico <sup>6</sup>            | Pelagic <i>Sargassum</i> |  | 24-172           | <36              |  | < 2          | < 11        | < 8         | <6-540      |               | 40-139           | < 1-7 | < 10        | < 2-3       |             | < 3-13      | < 5-17           |
| Mexico <sup>7</sup>            | Pelagic <i>Sargassum</i> |  | 55.91 ± 4.53     | 22.56 ± 2.24     |  | 0.40 ± 0.086 | 0.54 ± 0.02 | 0.69 ± 0.35 | 2.38 ± 0.16 |               | 11.03 ± 0.84     |       | 4.59 ± 0.84 | 0.50 ± 0.50 |             | 1.42 ± 0.18 | 4.84 ± 2.05      |
| Mexico <sup>7</sup>            | Pelagic <i>Sargassum</i> |  | 53.89 ± 1.30     | 19.63 ± 0.06     |  | 0.77 ± 0.20  | 0.70 ± 0.02 | 0.73 ± 0.15 | 2.25 ± 0.15 |               | 13.60 ± 0.30     |       | 4.72 ± 0.15 | 3.12 ± 1.76 |             | 5.38 ± 1.03 | 11.49 ± 2.39     |
| Jamaica <sup>8</sup>           | <i>S. fluitans</i> III   |  | 58.32 ± 2.2<br>9 | 23.21 ± 0.4<br>2 |  | 0.57 ± 0.02  | 0.89 ± 0.06 | 9.18 ± 0.37 | 4.47 ± 0.20 |               | 22.92 ± 0.6<br>6 |       | 3.52 ± 0.08 | 1.11 ± 0.47 |             | 4.21 ± 0.43 | 7.2 ± 1.20       |
| Jamaica <sup>8</sup>           | <i>S. natans</i> I       |  | 64.91 ± 0.61     | 22.17 ± 0.6<br>7 |  | 0.77 ± 0.43  | 0.91 ± 0.07 | 3.18 ± 0.99 | 4.29 ± 0.16 |               | 39.62 ± 0.3<br>6 |       | 4.21 ± 0.16 | 2.47 ± 1.79 |             | 2.37 ± 0.06 | 14.71 ± 1.9<br>8 |



|                                     |                          |  |                    |                  |  |                 |             |                 |              |      |                  |       |              |                 |  |             |                  |
|-------------------------------------|--------------------------|--|--------------------|------------------|--|-----------------|-------------|-----------------|--------------|------|------------------|-------|--------------|-----------------|--|-------------|------------------|
| Jamaica <sup>8</sup>                | <i>S. natans</i> VIII    |  | 60.30 ± 0.3<br>4   | 19.21 ± 0.6<br>5 |  | 0.40 ± 0.02     | 0.47 ± 0.03 | 1.50 ± 0.54     | 2.78 ± 0.14  |      | 13.03 ± 0.4<br>8 |       | 3.87 ± 0.10  | 0.33 ± 0.13     |  | 2.28 ± 0.18 | 6.35 ± 0.62      |
| Jamaica <sup>7</sup>                | Pelagic <i>Sargassum</i> |  | 86.84 ±<br>5.11    | 15.17 ±<br>1.77  |  | 0.39 ± 0.02     | 0.46 ± 0.07 | 1.47 ± 0.93     | 2.11 ± 0.11  |      | 22.30 ±<br>0.72  |       | 3.75 ± 0.34  | 0.85 ± 0.05     |  | 1.57 ± 0.20 | 3.87 ± 1.52      |
| Turks and<br>Caicos <sup>9</sup>    | <i>S. fluitans</i> III   |  | 26.25              |                  |  | 0.12            |             | 0.43            | 2.91         | 0.01 | <3               |       |              | 0.37            |  |             | 35.64            |
| Turks and<br>Caicos <sup>9</sup>    | <i>S. natans</i> I       |  | 29.76              |                  |  | 0.12            |             | ND              | 2.71         | 0.01 | <3               |       |              | 0.28            |  |             | 30.88            |
| Turks and<br>Caicos <sup>9</sup>    | <i>S. natans</i> VIII    |  | 20.94              |                  |  | 0.09            |             | 0.36            | 1.25         | ND   | <3               |       |              | 0.48            |  |             | 26.49            |
| Turks and<br>Caicos <sup>10</sup>   | Pelagic <i>Sargassum</i> |  | 25.65              |                  |  | 0.11            |             | 0.40            | 2.29         | 0.01 | < 3              |       |              | 0.38            |  |             | 31.00            |
| Turks and<br>Caicos <sup>11</sup>   | <i>S. fluitans</i> III   |  | 59.22 –<br>217.82  |                  |  | <LOD –<br>0.23  |             | 0.004–5.15      |              |      |                  |       |              | <LOD –<br>0.996 |  |             |                  |
| Turks and<br>Caicos <sup>11</sup>   | <i>S. natans</i> I       |  | 123.81 –<br>198.36 |                  |  | <LOD –<br>0.392 |             | <LOD –<br>0.399 |              |      |                  |       |              | <LOD –<br>0.499 |  |             |                  |
| Turks and<br>Caicos <sup>11</sup>   | <i>S. natans</i> VIII    |  | 82.44 –<br>197.95  |                  |  | <LOD –<br>0.22  |             | 0.004–2.82      |              |      |                  |       |              | <LOD –<br>0.66  |  |             |                  |
| Turks and<br>Caicos <sup>7</sup>    | Pelagic <i>Sargassum</i> |  | 123.69             |                  |  | 0.13            |             | <0.3            | 2.51         |      | 30.15            |       |              | 0.26            |  |             | 5.81             |
| Ghana <sup>12</sup>                 | Pelagic <i>Sargassum</i> |  | 13-54              |                  |  | 78-119          |             |                 | 24-36        |      |                  |       |              | 105-335         |  |             | 16-100           |
| Dominican<br>Republic <sup>13</sup> | Pelagic <i>Sargassum</i> |  | 14-42              | 7-17             |  | 0.1-3           | 0.4-1       |                 |              |      | 16-32            | 0.6-3 | 10-33        | 1-2             |  | 1-3         | 13-21            |
| Dominican<br>Republic <sup>14</sup> | Pelagic <i>Sargassum</i> |  | 67.75 ± 1.5<br>4   |                  |  | <0.001          | 0.47 ± 0.01 | 0.5 ± 0.01      | 2.632 ± 0.03 |      |                  |       | 0.201 ± 0.01 | <0.01           |  |             | 11.46 ± 0.1<br>9 |
| Dominican<br>Republic <sup>14</sup> | Pelagic <i>Sargassum</i> |  | 35.19 ± 0.2<br>4   |                  |  | <0.001          | 0.54 ± 0.01 | 0.54 ± 0.01     | 2.302 ± 0.03 |      |                  |       | <0.001       | 0.35 ± 0.01     |  |             | 9.32 ± 0.11      |
| Dominican<br>Republic <sup>14</sup> | Pelagic <i>Sargassum</i> |  | 71.89 ± 1.3<br>6   |                  |  | <0.001          | 0.36 ± 0.01 | 0.15 ± 0.01     | 1.85 ± 0.01  |      |                  |       | <0.001       | <0.01           |  |             | 3.83 ± 0.01      |
| Dominican<br>Republic <sup>14</sup> | Pelagic <i>Sargassum</i> |  | 73.99 ± 0.9<br>6   |                  |  | 0.11 ± 0.01     | 0.31 ± 0.01 | 0.91 ± 0.03     | 2.364 ± 0.01 |      |                  |       | 1.526 ± 0.14 | 0.74 ± 0.01     |  |             | 9.84 ± 0.07      |
| Dominican<br>Republic <sup>14</sup> | Pelagic <i>Sargassum</i> |  | 80.52 ± 1.1<br>3   |                  |  | <0.001          | 0.67 ± 0.02 | 0.98 ± 0.07     | 3.021 ± 0.02 |      |                  |       | 0.506 ± 0.01 | 1.34 ± 0.08     |  |             | 10.84 ± 0.1<br>0 |
| Dominican<br>Republic <sup>14</sup> | Pelagic <i>Sargassum</i> |  | 88.49 ± 0.9<br>3   |                  |  | 0.16 ± 0.01     | 0.06 ± 0.01 | 0.83 ± 0.03     | 1.609 ± 0.01 |      |                  |       | 0.937 ± 0.04 | 0.8 ± 0.05      |  |             | 7.6 ± 0.10       |

|                                  |                          |  |                  |              |  |                  |             |                   |                   |  |              |                  |              |                    |  |             |              |
|----------------------------------|--------------------------|--|------------------|--------------|--|------------------|-------------|-------------------|-------------------|--|--------------|------------------|--------------|--------------------|--|-------------|--------------|
| Dominican Republic <sup>14</sup> | Pelagic <i>Sargassum</i> |  | 101.89 ± 1.57    |              |  | <0.001           | 0.53 ± 0.01 | 0.41 ± 0.05       | 1.374 ± 0.02      |  |              |                  | <0.001       | 3.41 ± 0.10        |  |             | 8.96 ± 0.02  |
| Dominican Republic <sup>14</sup> | Pelagic <i>Sargassum</i> |  | 95.38 ± 0.94     |              |  | 0.4 ± 0.01       | 0.23 ± 0.01 | 1.62 ± 0.02       | 2.642 ± 0.02      |  |              |                  | 1.403 ± 0.08 | 1.19 ± 0.03        |  |             | 4.86 ± 0.04  |
| Dominican Republic <sup>7</sup>  | Pelagic <i>Sargassum</i> |  | 21.42 ± 0.93     | 26.93 ± 0.82 |  | 0.35 ± 0.01      | 0.47 ± 0.02 | 1.99 ± 0.36       | 3.53 ± 0.02       |  | 14.49 ± 0.17 |                  | 4.40 ± 0.62  | 0.45 ± 0.19        |  | 2.18 ± 0.09 | 13.73 ± 2.99 |
| Nigeria <sup>15</sup>            | Pelagic <i>Sargassum</i> |  |                  |              |  |                  |             |                   |                   |  |              |                  |              |                    |  |             | 0.5          |
| Austria                          |                          |  | 50 <sup>16</sup> |              |  | 5 <sup>16</sup>  |             | 100 <sup>17</sup> | 100 <sup>18</sup> |  |              | 10 <sup>16</sup> |              | 100 <sup>17</sup>  |  |             |              |
| Britain                          |                          |  | 20 <sup>16</sup> |              |  | 1 <sup>16</sup>  |             | 50 <sup>17</sup>  | 100               |  |              |                  |              | 100 <sup>17</sup>  |  |             |              |
| Canada                           |                          |  | 25 <sup>16</sup> |              |  | 8 <sup>16</sup>  |             | 75 <sup>17</sup>  | 100 <sup>17</sup> |  |              | 2 <sup>16</sup>  |              | 200 <sup>17</sup>  |  |             |              |
| Germany                          |                          |  |                  |              |  |                  |             |                   | 140 <sup>17</sup> |  |              |                  |              | 300 <sup>17</sup>  |  |             |              |
| EU                               |                          |  | 40 <sup>16</sup> |              |  | 1 <sup>16</sup>  |             | 200 <sup>17</sup> | 200 <sup>17</sup> |  |              |                  |              | 1000 <sup>17</sup> |  |             |              |
| Japan                            |                          |  | 15 <sup>16</sup> |              |  |                  |             |                   | 125 <sup>17</sup> |  |              |                  |              | 400 <sup>17</sup>  |  |             |              |
| Mexico                           |                          |  | 22 <sup>18</sup> |              |  | 37 <sup>18</sup> |             | 280 <sup>18</sup> |                   |  |              |                  |              | 400 <sup>18</sup>  |  |             |              |
| Poland                           |                          |  | 30 <sup>16</sup> |              |  | 3 <sup>16</sup>  |             | 100 <sup>17</sup> | 100 <sup>17</sup> |  |              | 10 <sup>16</sup> |              | 100 <sup>17</sup>  |  |             |              |

\* This study

<sup>1</sup> Gobert et al. 2022

<sup>2</sup> Cipolloni et al. 2022

<sup>3</sup> Dassié et al. 2021

<sup>4</sup> Ortega-Flores et al. 2022

<sup>5</sup> Vásquez-Delfín et al. 2021

<sup>6</sup> Rodríguez-Martínez et al. 2020

<sup>7</sup> Tonon et al. 2022

<sup>8</sup> Davis et al. 2021

<sup>9</sup> Milledge et al. 2020

<sup>10</sup> Milledge et al. 2010

<sup>11</sup> Nielsen et al. 2021

<sup>12</sup> Addico and deGraft-Johnson 2016

<sup>13</sup> Fernández et al. 2017

<sup>14</sup> Liranzo-Gómez et al. 2023

<sup>15</sup> Oyesiku and Egunyomi 2014

<sup>16</sup> Galán and Romero 2008

<sup>17</sup> Belmonte et al. 2010

<sup>18</sup> NOM-147-SEMARNAT-SSA 11-2004

## Supplemental Figures

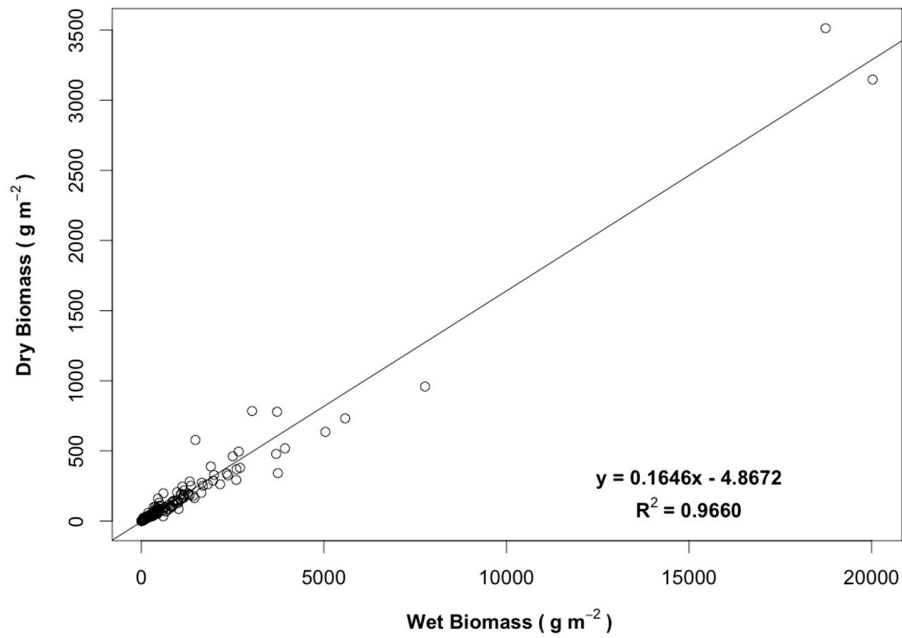

**Figure S1.** Relationship between wet weight and dry weight measurements taken for sargasso at both Dania Beach and Crandon Park for all sampling time

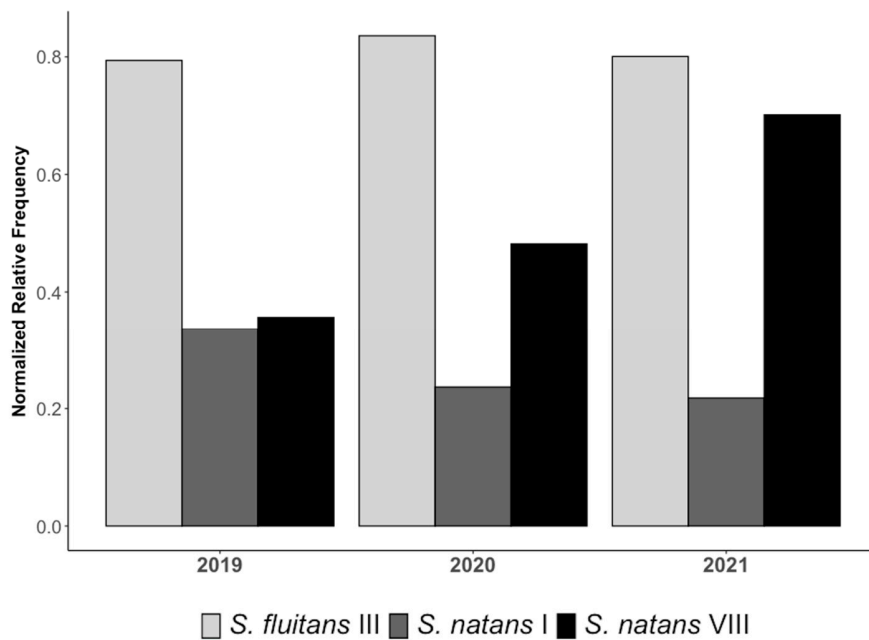

**Figure S2:** Interannual relative frequency of sargasso morphotypes collected from citizen science data at Dania Beach from 2019 to 2021

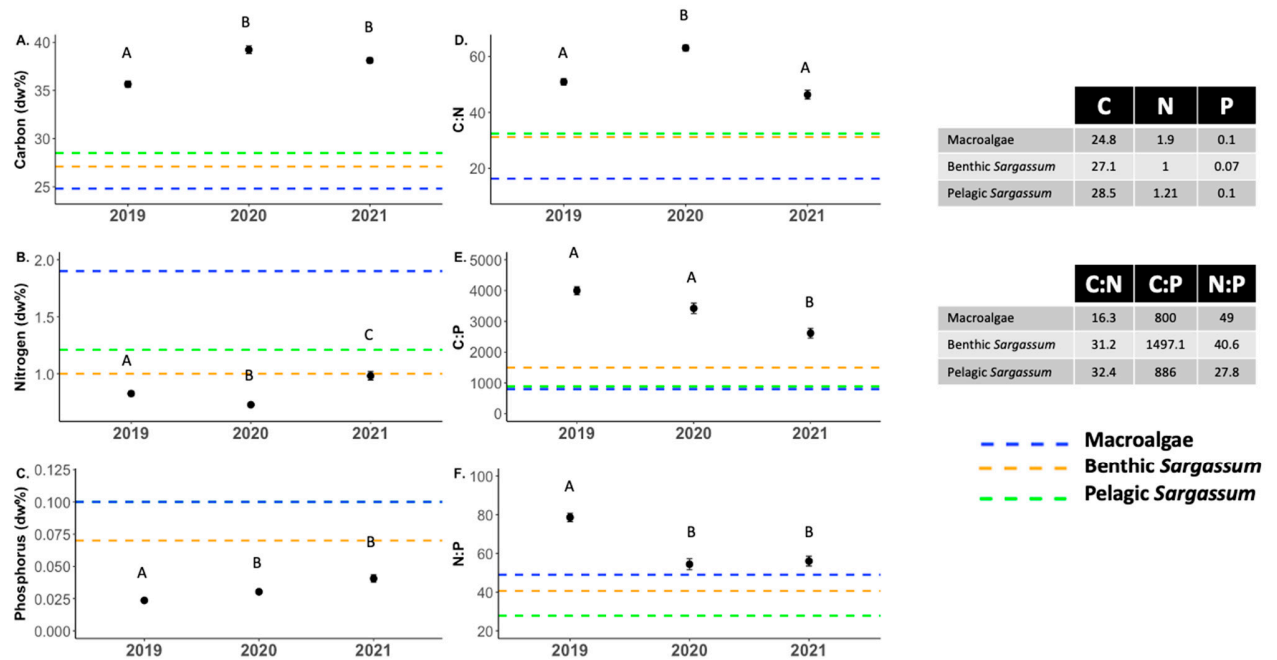

**Figure S3:** (A–C) Annual average carbon, nitrogen, and phosphorus tissue contents of sargasso and (D–F) annual average carbon, nitrogen, and phosphorus molar ratios of sargasso collected at Dania Beach from 2019 to 2021. The blue dashed line represents the average nutrient content values for macroalgae reported by Duarte in 1992 [43]. The orange dotted line represents the average nutrient content value for benthic *Sargassum* obtained by averaging published values of nutrient content for *Sargassum* spp. [44–46]. The green dashed line represents the average nutrient content value for sargasso reported by Lapointe et al. in 2021 [21]. The green dashed line in panel (C) is overlapping with the value reported in the blue dashed line for macroalgae. Different letters indicate post hoc analyses (Dunn test) when nutrient content differed across years.

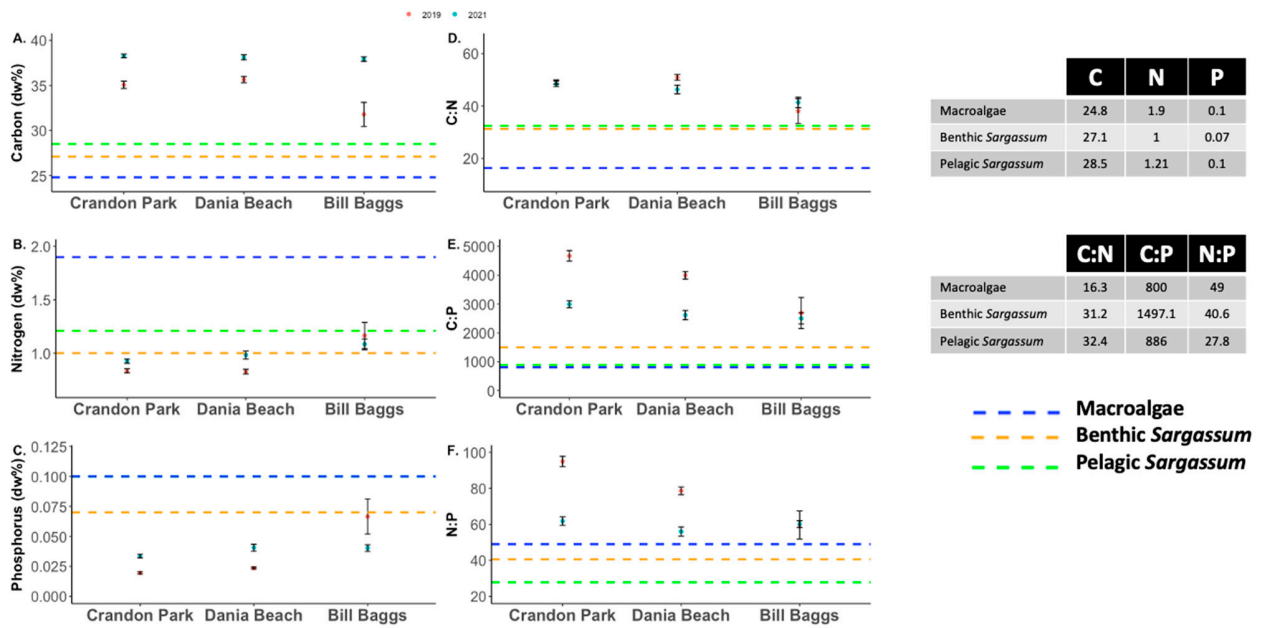

**Figure S4:** (A–C) Annual average carbon, nitrogen, and phosphorus tissue contents of sargasso and (D–F) annual average carbon, nitrogen, and phosphorus molar ratios of sargasso collected at all three sites in 2019 and 2021. The blue dashed line represents the average nutrient content value for macroalgae reported by Duarte in 1992 [43]. The orange dotted line represents the average nutrient content value for benthic *Sargassum* obtained by averaging published values of nutrient content for *Sargassum* spp. [44–46]. The green dashed line represents the average nutrient content values for sargasso reported by Lapointe et al. in 2021 [21]. The green dashed line in panel (C) is overlapping with the value reported in the blue dashed line for macroalgae. Different letters indicate post hoc analyses (Dunn test) when nutrient content differed across sites and years.

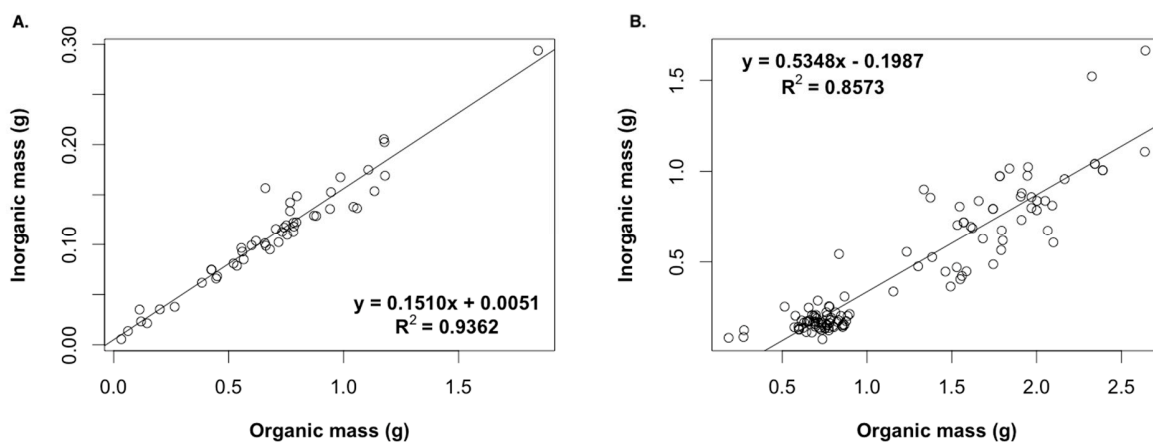

**Figure S5:** Relationship between organic and inorganic mass of sargasso in (A) cleaned and (B) uncleaned specimens of sargasso.
